# Supplementary material
Source: PubMed Central journal article supplement (PMC4135699)
Supplement: JB.01696-14_zjb999093304so1.pdf [file JB.01696-14_zjb999093304so1.pdf]

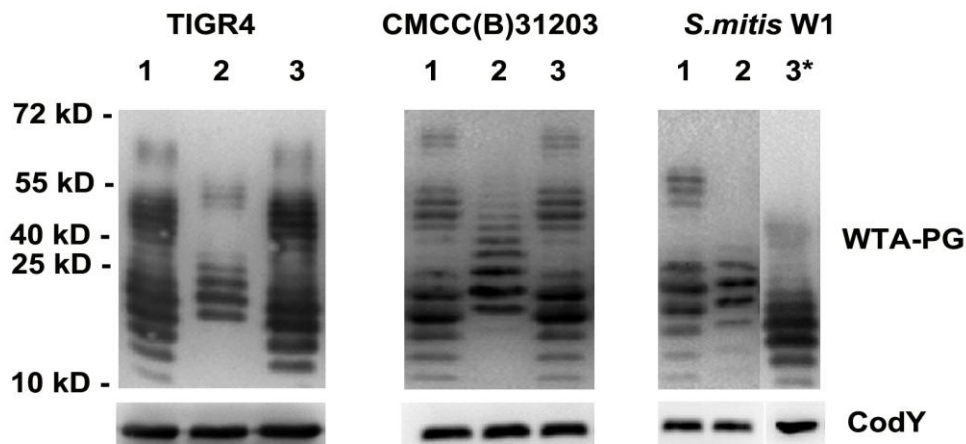

1

2 Fig S1 Impact of *rafX* gene deletion on WTA-PG banding pattern in the genetic backgrounds of TIGR4  
 3 (Serotype 4), CMCC (B)31203 (Serotype 3) and *S. mitis* W1. Pneumococcal cells were then lysed by  
 4 incubating the cultures at 37 °C for 30 min in the presence of 0.4% sodium deoxycholate; Whereas *S. mitis*  
 5 cells were digested with 300 U/ml mutanolysin (Sigma-Aldrich) and 5 mg/ml lysozyme (Sigma-Aldrich) in  
 6 50 mM Tris buffer (pH 7.5) at 37 °C for 4 hours. TA samples were separated on 10% SDS-PAGE gels and  
 7 immunoblotted with monoclonal mouse anti-*P*-Cho IgA (TEPC-15). 1, 2 and 3 denote wild type strain,  
 8  $\Delta$ *rafX* mutant, and complemented strain, respectively. 3\* denote R6  $\Delta$ *rafX* mutant was ectopically  
 9 complemented with SM12261\_0467 from strain *S. mitis* NCTC12261. The *S. mitis* W1  $\Delta$ *smi0513* mutant  
 10 was constructed by insertion-duplication mutagenesis as described elsewhere (1). Briefly, the internal *rafX*  
 11 fragment was PCR amplified with primers Wuk13 and Wuk14. The resulting DNA fragment was cloned into  
 12 plasmid pEVP3 after enzyme digestion to generate plasmid pYYB13. This plasmid was then used to  
 13 transform *S. mitis* W1 following protocols to transform *S. pneumoniae* (2).

14





Contig\_ST320\_I 1050  
Contig\_ST2296\_I 1050  
Contig\_ST242\_I 1050  
Contig\_ST876\_I 1050  
Contig\_ST910\_I 1050  
Contig\_ST81\_I 1050  
Contig\_ST2754\_I 1050  
Contig\_ST320\_I 1050  
Contig\_ST902\_I 1050  
Contig\_ST910\_I 1050  
Contig\_ST271\_I 1050  
Contig\_ST271\_I 1050  
Contig\_ST4112\_I 1050  
Contig\_ST3173\_I 1050  
Contig\_ST3263\_I 1050  
Contig\_D39 1050  
Contig\_ST271\_C 1050  
Contig\_ST910\_C 1050  
Contig\_ST280\_C 1050  
Contig\_ST338\_C 1050  
Contig\_ST910\_C 1050  
Contig\_ST3173\_C 1050  
Contig\_ST8781\_C 1050  
Contig\_ST2754\_C 1050  
Contig\_ST910\_C 1050  
Contig\_ST242\_C 1050  
Contig\_ST320\_C 1050  
Contig\_ST6791\_C 1050  
Contig\_ST4745\_C 1050  
Contig\_ST4113\_C 1050  
Contig\_ST876\_C 1050  
Contig\_TIGR\_4 1050  
Consensus 1050

Contig\_ST320\_I 1200  
Contig\_ST2296\_I 1200  
Contig\_ST242\_I 1200  
Contig\_ST876\_I 1200  
Contig\_ST910\_I 1200  
Contig\_ST81\_I 1200  
Contig\_ST2754\_I 1200  
Contig\_ST320\_I 1200  
Contig\_ST902\_I 1200  
Contig\_ST910\_I 1200  
Contig\_ST271\_I 1200  
Contig\_ST271\_I 1200  
Contig\_ST4112\_I 1200  
Contig\_ST3173\_I 1200  
Contig\_ST3263\_I 1200  
Contig\_D39 1200  
Contig\_ST271\_C 1200  
Contig\_ST910\_C 1200  
Contig\_ST280\_C 1200  
Contig\_ST338\_C 1200  
Contig\_ST910\_C 1200  
Contig\_ST3173\_C 1200  
Contig\_ST8781\_C 1200  
Contig\_ST2754\_C 1200  
Contig\_ST910\_C 1200  
Contig\_ST242\_C 1200  
Contig\_ST320\_C 1200  
Contig\_ST6791\_C 1200  
Contig\_ST4745\_C 1200  
Contig\_ST4113\_C 1200  
Contig\_ST876\_C 1200  
Contig\_TIGR\_4 1200  
Consensus 1200

Contig\_ST320\_I 1311  
Contig\_ST2296\_I 1311  
Contig\_ST242\_I 1311  
Contig\_ST876\_I 1311  
Contig\_ST910\_I 1311  
Contig\_ST81\_I 1311  
Contig\_ST2754\_I 1311  
Contig\_ST320\_I 1311  
Contig\_ST902\_I 1311  
Contig\_ST910\_I 1311  
Contig\_ST271\_I 1311  
Contig\_ST271\_I 1311  
Contig\_ST4112\_I 1311  
Contig\_ST3173\_I 1311  
Contig\_ST3263\_I 1311  
Contig\_D39 1311  
Contig\_ST271\_C 1311  
Contig\_ST910\_C 1311  
Contig\_ST280\_C 1311  
Contig\_ST338\_C 1311  
Contig\_ST910\_C 1311  
Contig\_ST3173\_C 1311  
Contig\_ST8781\_C 1311  
Contig\_ST2754\_C 1311  
Contig\_ST910\_C 1311  
Contig\_ST242\_C 1311  
Contig\_ST320\_C 1311  
Contig\_ST6791\_C 1311  
Contig\_ST4745\_C 1311  
Contig\_ST4113\_C 1311  
Contig\_ST876\_C 1311  
Contig\_TIGR\_4 1311  
Consensus 1311

17

18 Fig S2 Conservation of *rafX* gene among clinical isolated strains by sequencing. The underlines indicate the  
19 initial codon of TTG and the terminal codon of TAA.

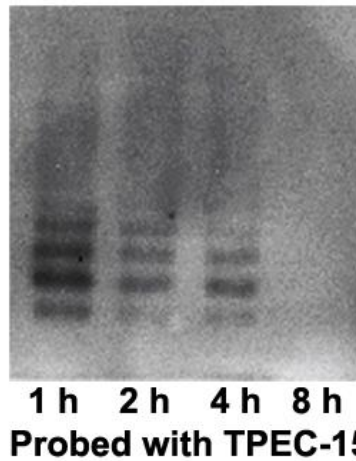

Fig S3 Banding pattern of WTA-PG from R6  $\Delta rafX$  mutant following digestion with enzymes. The enzymes (mutanolysin plus lysozyme) digested R6  $\Delta rafX$  cells were sedimented after a 2-h digestion and aliquots of the supernatants were incubated at 37 °C with shaking for another 1, 2, 4 and 8 h. TA samples were separated on 10% SDS-PAGE gels and immunoblotted with TEPC-15.

Download Graphics Sort by: E value

gi|15600192|ref|NP\_253686.1| O-antigen ligase, WaaL [Pseudomonas aeruginosa PAO1]  
Sequence ID: lcl|10625 Length: 401 Number of Matches: 2

Range 1: 264 to 322 Graphics Next Match Previous Match

| Score             | Expect | Method                                                       | Identities | Positives  | Gaps      |
|-------------------|--------|--------------------------------------------------------------|------------|------------|-----------|
| 18.9 bits(37)     | 0.28   | Compositional matrix adjust.                                 | 15/63(24%) | 29/63(46%) | 7/63(11%) |
| <b>RafX</b> Query | 266    | RISINDAGMALFKQNPFWGEG---FLTYMHSYPRIHAPYHEHANSLYIDTILSYGIVGTI | 306        | 322        |           |
|                   |        | R IW + ++P+ G G P+ + S + A H++ + ++ GI+G +                   |            |            |           |
| <b>WaaL</b> Sbjct | 264    | RPEIWADALRQISEHPWLGHGVDHPMRIVLSNGMLLA----DPHNIELGVLFAGGIIGLL | 303        | 319        |           |
| Query             | 323    | LLV 325                                                      |            |            |           |
|                   |        | L V                                                          |            |            |           |
| Sbjct             | 320    | LWV 322                                                      |            |            |           |

Fig S4 Alignment of *S. pneumoniae* RafX with *P. aeruginosa* PAO1 WaaL using BLAST database. RafX contains a H306 residue which is structurally equivalent to the H303 residue of *P. aeruginosa* PAO1 WaaL.

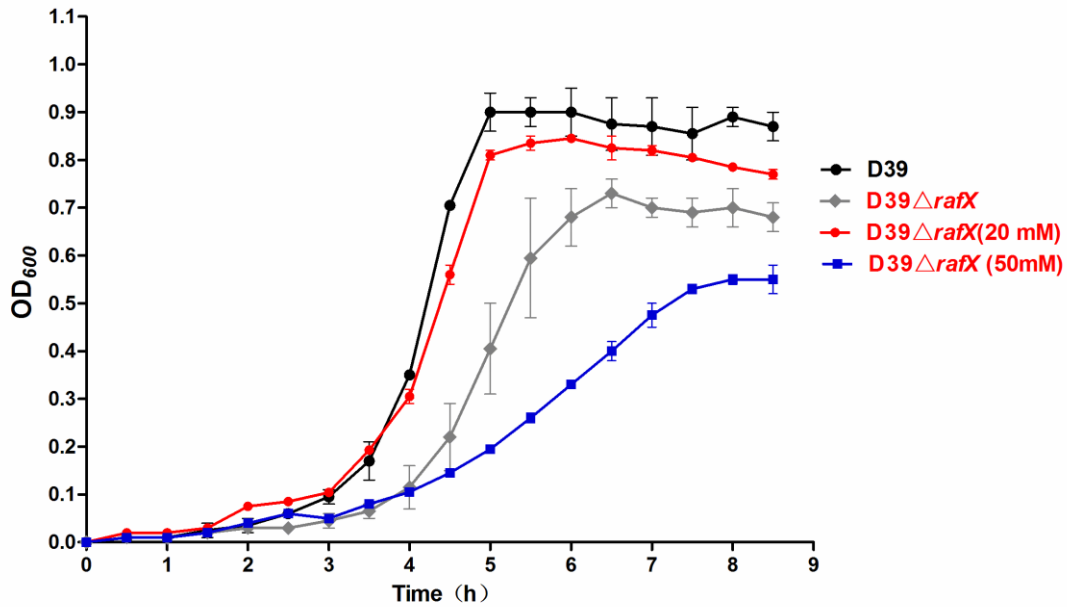

FIG S5 Growth curve of bacteria grown in the indicated media. Bacteria were grown in C+Y medium at 37 °C, and media for D39  $\Delta$ rafX mutant were supplemented with the indicated concentrations of MgCl<sub>2</sub>. Absorbance measurements were taken every 1 h using a 722s Spectrophotometer.

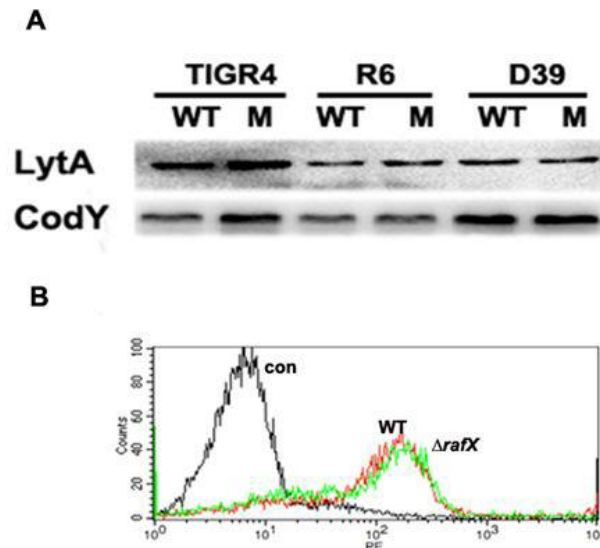

FIG S6 LytA expression was not influenced by *rafX* deletion. (A) Pneumococcal bacteria harvested at mid-exponential phase, and the total amounts of LytA in bacterial lysates of pneumococcal strains were determined by Western blotting with polyclonal mouse anti-LytA serum. M denotes  $\Delta$ rafX. (B) Fluorescence-activated cell sorting analysis was performed to show surface-exposed LytA in the wild type R6 strain and the  $\Delta$ rafX mutant. Bacterial cells were treated with mouse antisera against LytA recombinant protein (anti-LytA antibody, dilution 1: 100) in blocking buffer (5% fetal bovine serum, 1  $\times$  PBS) for 60 min at 37 °C. Con indicate that R6 strain was incubated with normal mouse serum. The bacterial pellets were washed three times with PBS and incubated with goat anti-mouse IgG-PE secondary antibodies at 1: 200 (Santa Cruz Biotech) for 60 min at 4 °C.

47 **REFERENCES**

- 48 1. **Zhang J-R, Idanpaan-Heikkila I, Fischer W, Tuomanen E.** 1999. Pneumococcal *licD2* gene is  
49 involved in phosphorylcholine metabolism. *Mol Microbiol.* **31**:1477-1481.
- 50 2. **Wu K, Zhang X, Shi J, Li N, Li D, Luo M, Cao J, Yin N, Wang H, Xu W, He Y, Yin Y.** 2010.  
51 Immunization with a combination of three pneumococcal proteins confers additive and broad  
52 protection against *Streptococcus pneumoniae* infections in mice. *Infect Immun.* **78**:1276-1283.
